# Supplementary material for: Responses of Sphagneticola trilobata, Sphagneticola calendulacea and Their Hybrid to Drought Stress
Source: MDPI journal article supplement (doi:10.3390/ijms222011288), 2021-10-19
Supplement: s1 [file s1]

## Supplementary Figures

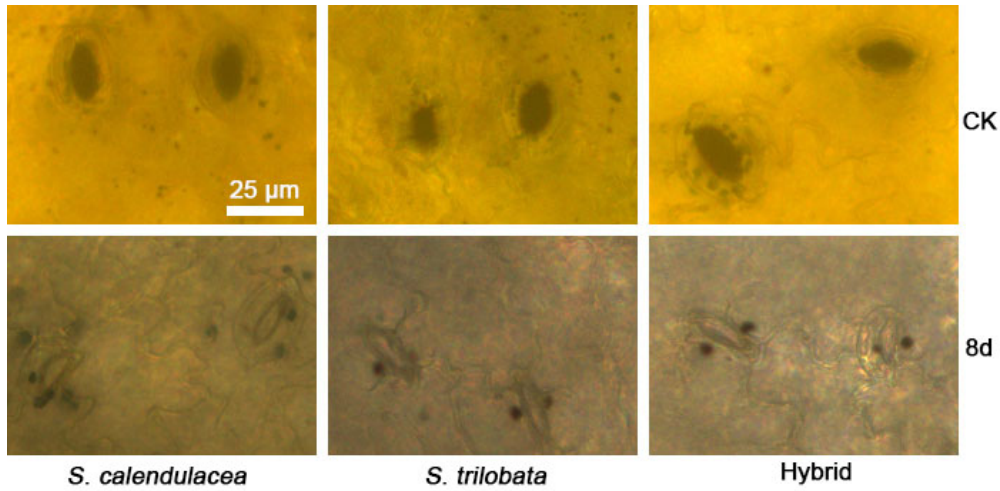

**Supplementary Figure S1.** After 8 days of normal irrigation (CK) and drought stress treatment (8d), potassium ion localization in leaves of *S. calendulacea*, *S. trilobata* and their hybrid.

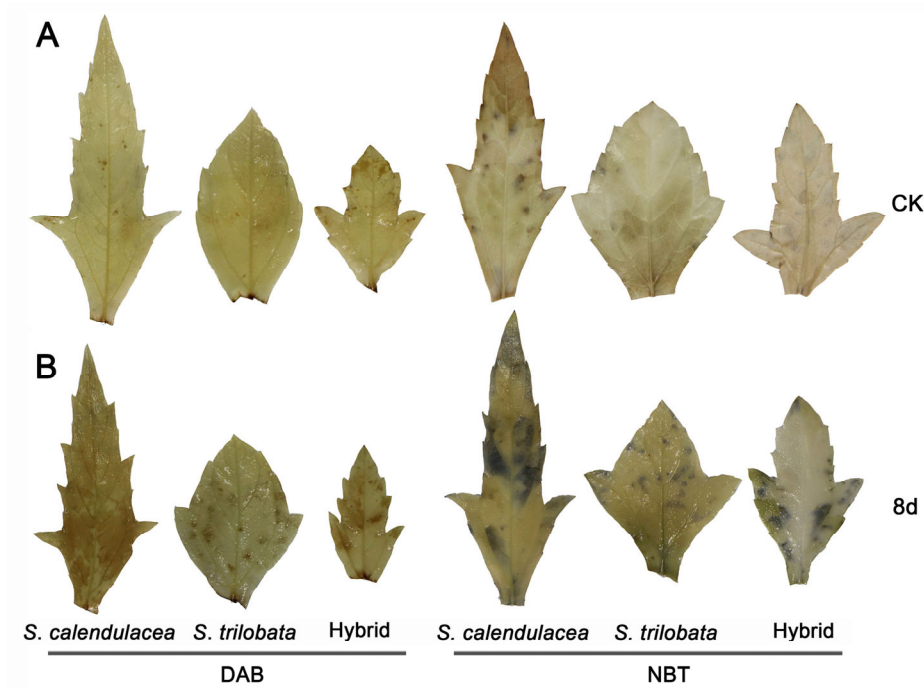

**Supplementary Figure S2.** Hydrogen peroxide (3,3'-diaminobenzidine (DAB) staining, A) and superoxide anion (nitroblue tetrazolium (NBT) staining, B) localization in leaves of *S. calendulacea*, *S. trilobata* and their hybrid after 8 days of normal irrigation (CK) and drought stress treatment (8d).

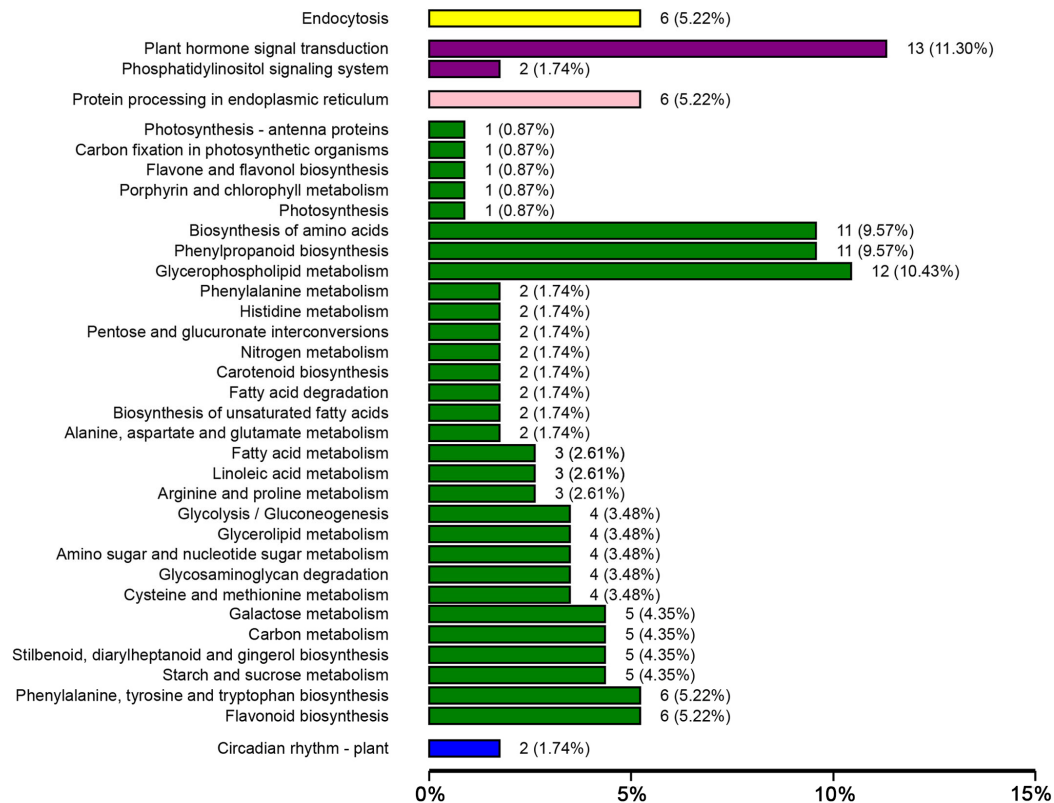

**Supplementary Figure S3.** KEGG classification of differentially expressed genes in *S. calendulacea* under normal irrigation (control) and drought treatment (treatment).

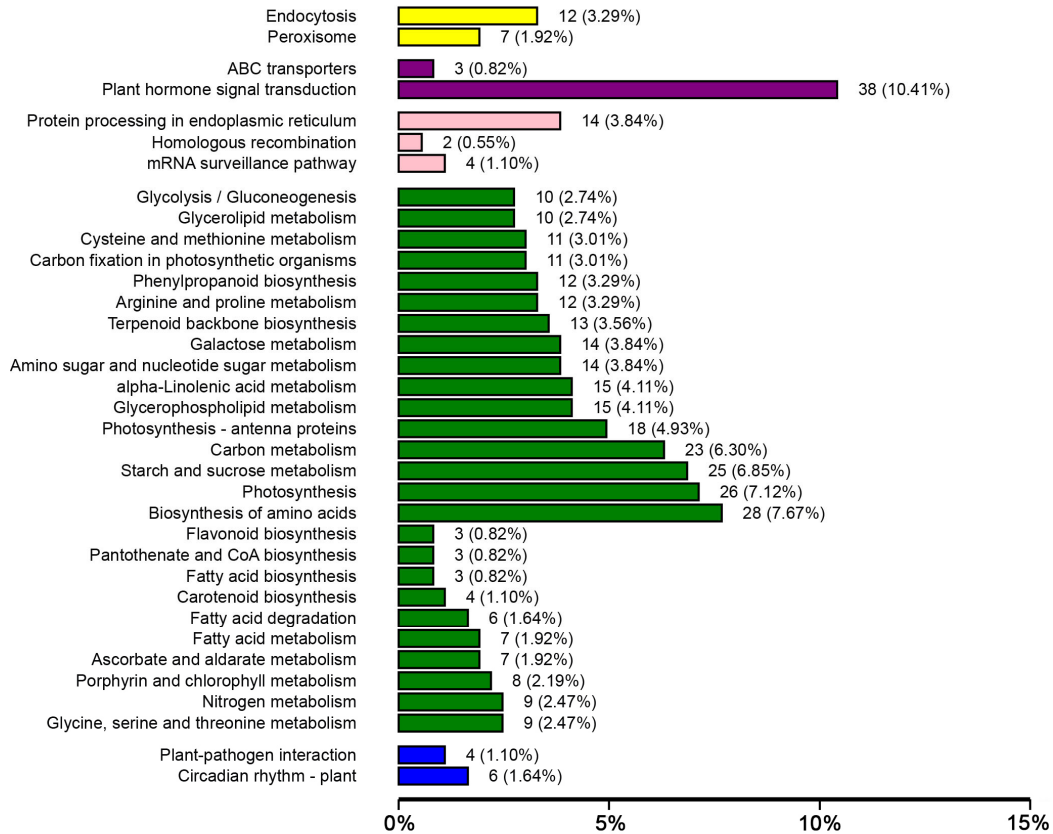

**Supplementary Figure S4.** KEGG classification of differentially expressed genes in *S. trilobata* under normal irrigation (control) and drought treatment (treatment).

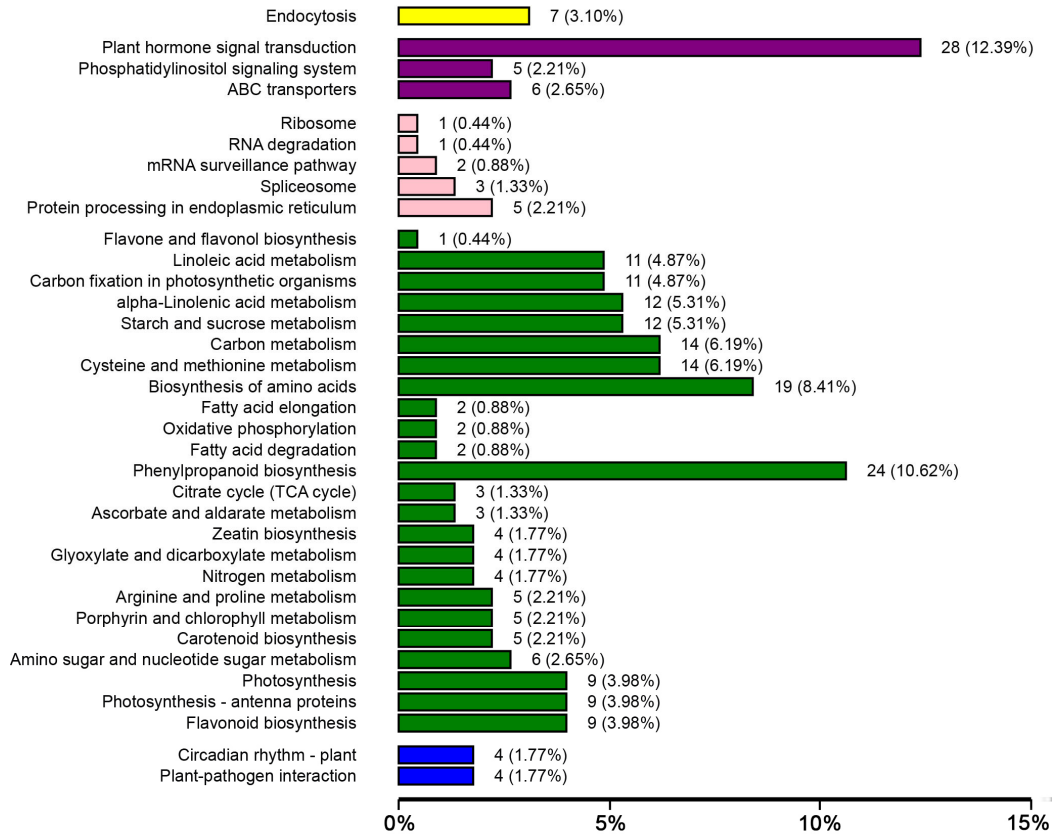

**Supplementary Figure S5.** KEGG classification of differentially expressed genes in hybrid under normal irrigation (control) and drought treatment (treatment).

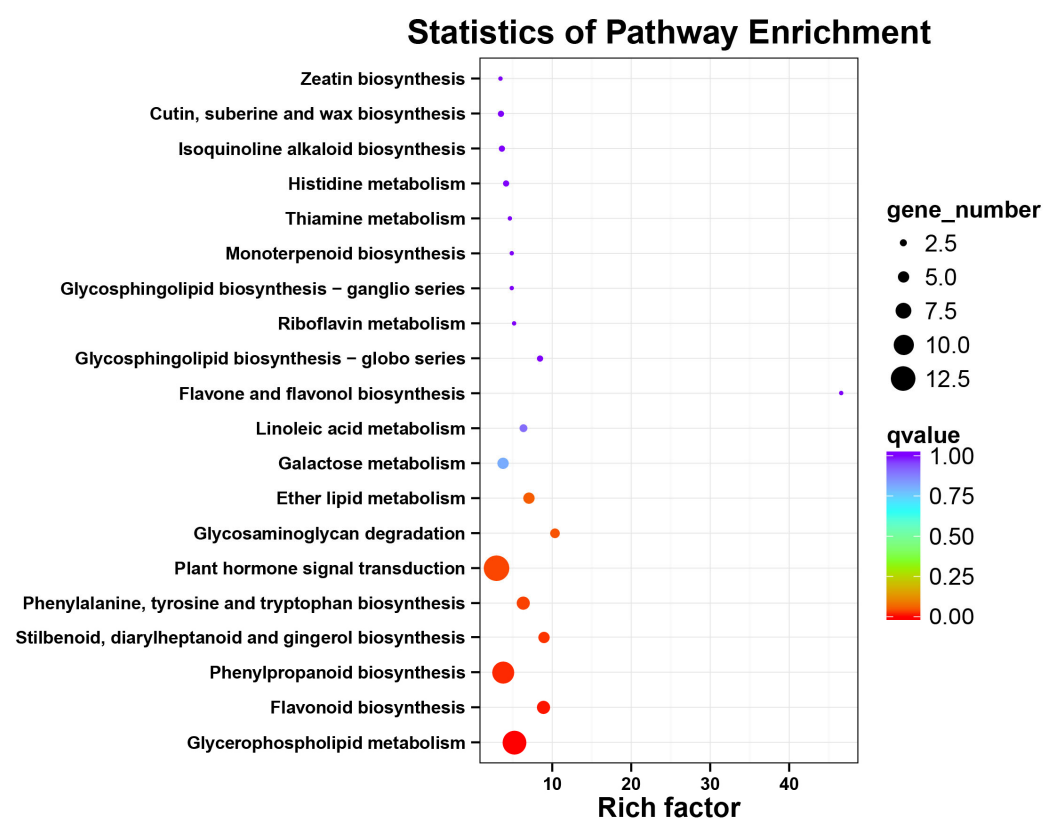

**Supplementary Figure S6.** Scatter plot of KEGG pathway enrichment of differentially expressed genes in *S. calendulacea* under normal irrigation (control) and drought treatment (treatment).

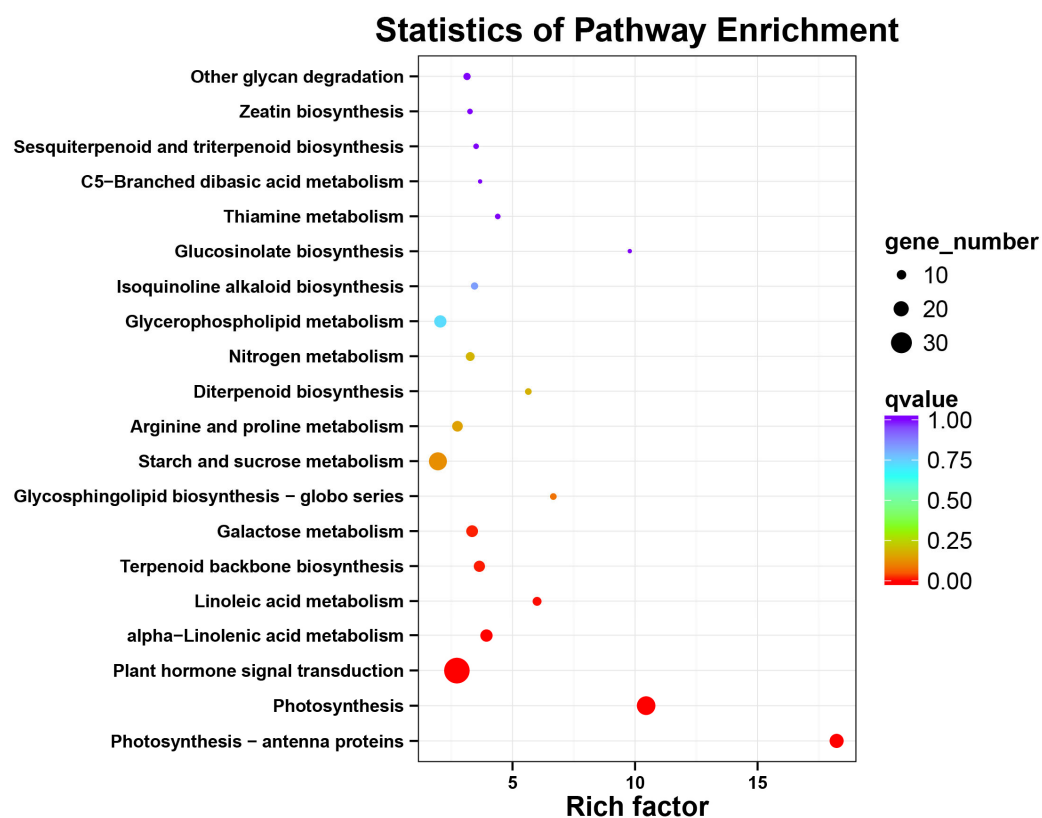

**Supplementary Figure S7.** Scatter plot of KEGG pathway enrichment of differentially expressed genes in *S. trilobata* under normal irrigation (control) and drought treatment (treatment).

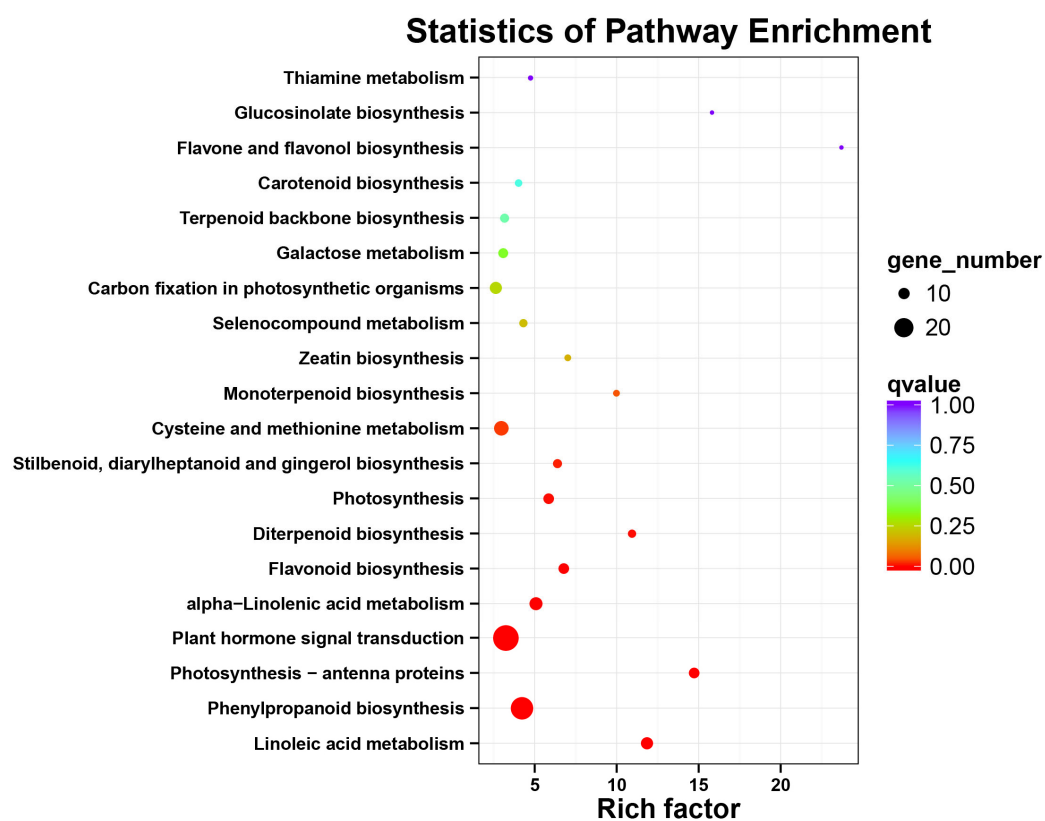

**Supplementary Figure S8.** Scatter plot of KEGG pathway enrichment of differentially expressed genes in hybrid under normal irrigation (control) and drought treatment (treatment).

## Supplementary Table

**Supplementary Table S1.** Primers used for Real-Time PCR analysis

| Gene ID<br>(Gene name)                            | Primer sequence (5'-3')                                  | Gene description        |
|---------------------------------------------------|----------------------------------------------------------|-------------------------|
| c185702.graph_c0<br>( <i>GAPDH</i> )              | F: GGCTCGACTCGGCATATTCT<br>R: CGGCTGCCTTTGGTCTATGT       | Internal reference      |
| c181991.graph_c0<br>( <i>PGK</i> )                | F: ACCGATAAACCTTGCGCCTT<br>R: GATTACCTTGATGGGGCGGT       | Calvin cycle            |
| c173064.graph_c3<br>( <i>RubL</i> )               | F: CGCCTCACGGTATCCAAGTT<br>R: TCTTCGCAATTACCCGCAGT       | Calvin cycle            |
| c189563.graph_c0<br>( <i>P5CS</i> )               | F: GGGCAAGTGGTAGAAGGTGA<br>R: ACTCTACTTGACGAAACAAACC     | Proline synthesis       |
| c180187.graph_c1<br>( <i>Fructofuranosidase</i> ) | F: CAAACTTTAAGGCTGCCCCC<br>R: TTGGAAGATGGGTGGAGCAA       | Sugar synthesis         |
| c191254.graph_c0<br>( <i>Glucosidase</i> )        | F: CGCGACCGCTATTCTTACA<br>R: CATCAACAGAGACTGCCCCC        | Sugar synthesis         |
| c176762.graph_c0<br>( <i>NCED</i> )               | F: GGCATTGGACGCGATTGAAG<br>R: TCGAACAACGGGTTAGCTCC       | ABA synthesis           |
| c188273.graph_c1<br>( <i>ABA1</i> )               | F: TAGCCCAACAACACTTCACTCA<br>R: AGCCACCAACACCCTTATGT     | ABA synthesis           |
| c182856.graph_c1<br>( <i>ABF</i> )                | F: GCGAGATGACCCTTGAGGAG<br>R: TCCCAGTTCCACCCTGTTGA       | ABA signal transduction |
| c188492.graph_c0<br>( <i>PsaA</i> )               | F: GGGGCAAGTGTTCCGATCTATTA<br>R: AAAAACATGAAGCAGCGCCAC   | Photosynthesis          |
| c168832.graph_c2<br>( <i>PsbD</i> )               | F: ACTGGAAATGAGAGTATTATCCCG<br>R: AGCTATCAGATCGGGCTTGATG | Photosynthesis          |
| c178623.graph_c0<br>( <i>Lhca2</i> )              | F: TGTTTGCTCACCTTGCTGAC<br>R: CTTGGCCTACAATCAATCCTCCT    | Chlorophyll synthesis   |
| c183538.graph_c0<br>( <i>Lhcb1</i> )              | F: AGCAACAACGCTTGGGCTTA<br>R: CTTGTTGATAAGACACCCGCA      | Chlorophyll synthesis   |
| c117063.graph_c0<br>( <i>CAT</i> )                | F: CGCAGAGTTGCAGAAGGTCT<br>R: ACAATAGGCACCGCCATAGG       | CAT synthesis           |
| c175474.graph_c0<br>( <i>SOD</i> )                | F: GAACCCAAGATTCCGGTTGC<br>R: TTGGAGGAAAAGTACTGCAT       | SOD synthesis           |
| c176172.graph_c0<br>( <i>POD</i> )                | F: ATGCGGGTACATTTAGAGGGT<br>R: ACACAGGTAACCATCAACCATA    | POD synthesis           |



## Supplementary Methods

### Potassium ion localization

The localization of potassium ion was according to the method described by Zhang et al. [1] with slightly changed. Prepare the first solution: dissolve 4.6 g of  $\text{NaNO}_2$  in 10 ml of deionized water, and then added 3.2 ml of 6 M acetic acid. Then 0.8 g of  $\text{Co}(\text{NO}_3)_2$  and 0.5 g of  $\text{Pb}(\text{NO}_3)_2$  were mixed and added to the first solution. Store at 4 °C for 12 h after mixing, and save for use after filtering and avoid light at 4 °C. After cleaning, the leaves were put into the above solution containing 15%, vacuumized for 10 min and soaked in dark for 5 min. Then wash the leaves with 50% ethanol for 3 times, vacuum the leaves with  $(\text{NH}_4)_2\text{S}$  containing 5% for 5 min, soak them in dark for 5 min, wash the leaves with 50% ethanol for 3 times and decolorize them in 80% acetone. Under the light microscope, the brown black crystal in the leaves was potassium precipitation.

### Tissue localization of hydrogen peroxide and superoxide anion

3,3'-diaminobenzidine (DAB) and nitroblue tetrazolium (NBT) were used to determine hydrogen peroxide and superoxide anion in leaves, respectively [2]. The leaves were soaked in 0.5 mg ml<sup>-1</sup> DAB solution (dissolved in 0.05 M phosphate buffer with pH 7.0), vacuumized and soaked in dark for 4 h, and then decolorized with 80% acetone. Hydrogen peroxide and DAB form brown matter in leaves. The leaves were soaked in 1 mg ml<sup>-1</sup> NBT solution (dissolved in 0.05 M phosphate buffer solution with pH 6.4), vacuumized and soaked in dark for 4 h, and then decolorized with 80% acetone. The superoxide anion in leaves and NBT form blue substance in leaves.

## Supplementary References

1. Zhang, L.; Wang, Q.; Li, S.; Dong, H.; Yao, Y. *In situ* detection technology of potassium in submicroscopic structures of plants. *Plant Physiol. J.* **2015**, *51*, 1524–1528.
2. Liu, Y.; Ren, D.; Pike, S.; Pallardy, S.; Gassmann, W.; Zhang, S. Chloroplast-generated reactive oxygen species are involved in hypersensitive response-like cell death mediated by a mitogen-activated protein kinase cascade. *Plant J.* **2007**, *51*, 941–954.
